# Supplementary material
Source: HighWire-hosted journal article supplement (http://ajnr-stage2.highwire.org/highwire/filestream/52800/field_highwire_adjunct_files/0/16-00123.pdf)
Supplement: 16-00123.pdf [file 16-00123.pdf]

**On-line Table: Demographic and clinical data of patients who underwent shunt surgery<sup>a</sup>**

|                           | Subjects of the Study |             | Patients Who Dropped Out of the Study |            | P Value             |
|---------------------------|-----------------------|-------------|---------------------------------------|------------|---------------------|
|                           | No.                   |             | No.                                   |            |                     |
| Age (yr)                  | 60                    | 76.4 (3.8)  | 43                                    | 76.9 (4.6) | .569 <sup>b</sup>   |
| Sex, male                 | 60                    | 34 (57%)    | 43                                    | 28 (65%)   | .388 <sup>c</sup>   |
| Education (yr)            | 60                    | 10.2 (3.0)  | 43                                    | 10.6 (3.3) | .417 <sup>b</sup>   |
| Duration of symptoms (yr) | 60                    | 3.3 (1.6)   | 43                                    | 3.3 (1.4)  | .876 <sup>b</sup>   |
| LP shunt                  | 60                    | 23 (38%)    | 43                                    | 9 (21%)    | .060 <sup>c</sup>   |
| iNPHGS total (12)         | 60                    | 6.3 (1.9)   | 39                                    | 7.0 (1.9)  | .076 <sup>d</sup>   |
| iNPHGS gait (4)           | 60                    | 2.3 (0.7)   | 39                                    | 2.3 (0.8)  | .803 <sup>d</sup>   |
| iNPHGS cognitive (4)      | 60                    | 2.3 (0.8)   | 39                                    | 2.7 (0.8)  | .025 <sup>d,e</sup> |
| iNPHGS urinary (4)        | 60                    | 1.7 (1.1)   | 39                                    | 2.1 (1.2)  | .101 <sup>d</sup>   |
| TUG                       | 55                    | 22.1 (30.1) | 33                                    | 15.8 (8.9) | .418 <sup>d</sup>   |
| MMSE (30)                 | 60                    | 21.7 (4.6)  | 38                                    | 19.0 (5.3) | .011 <sup>d,e</sup> |

**Note:**—LP indicates lumboperitoneal.

<sup>a</sup> Data on age, education, duration of symptoms, iNPHGS, TUG, and MMSE are means (SDs). Data for the other variables are number of patients (%). Numbers in parentheses in column 1 refer to the maximum scores for the tests.

<sup>b</sup> *t* test.

<sup>c</sup>  $\chi^2$  test.

<sup>d</sup> Mann-Whitney *U* test.

<sup>e</sup> *P* value < .05.
